# Supplementary material
Source: Springer Nature journal article supplement (https://www.springermedizin.de/resource/supplementary/12914_2009_85_MOESM4_ESM.pdf/9537482)

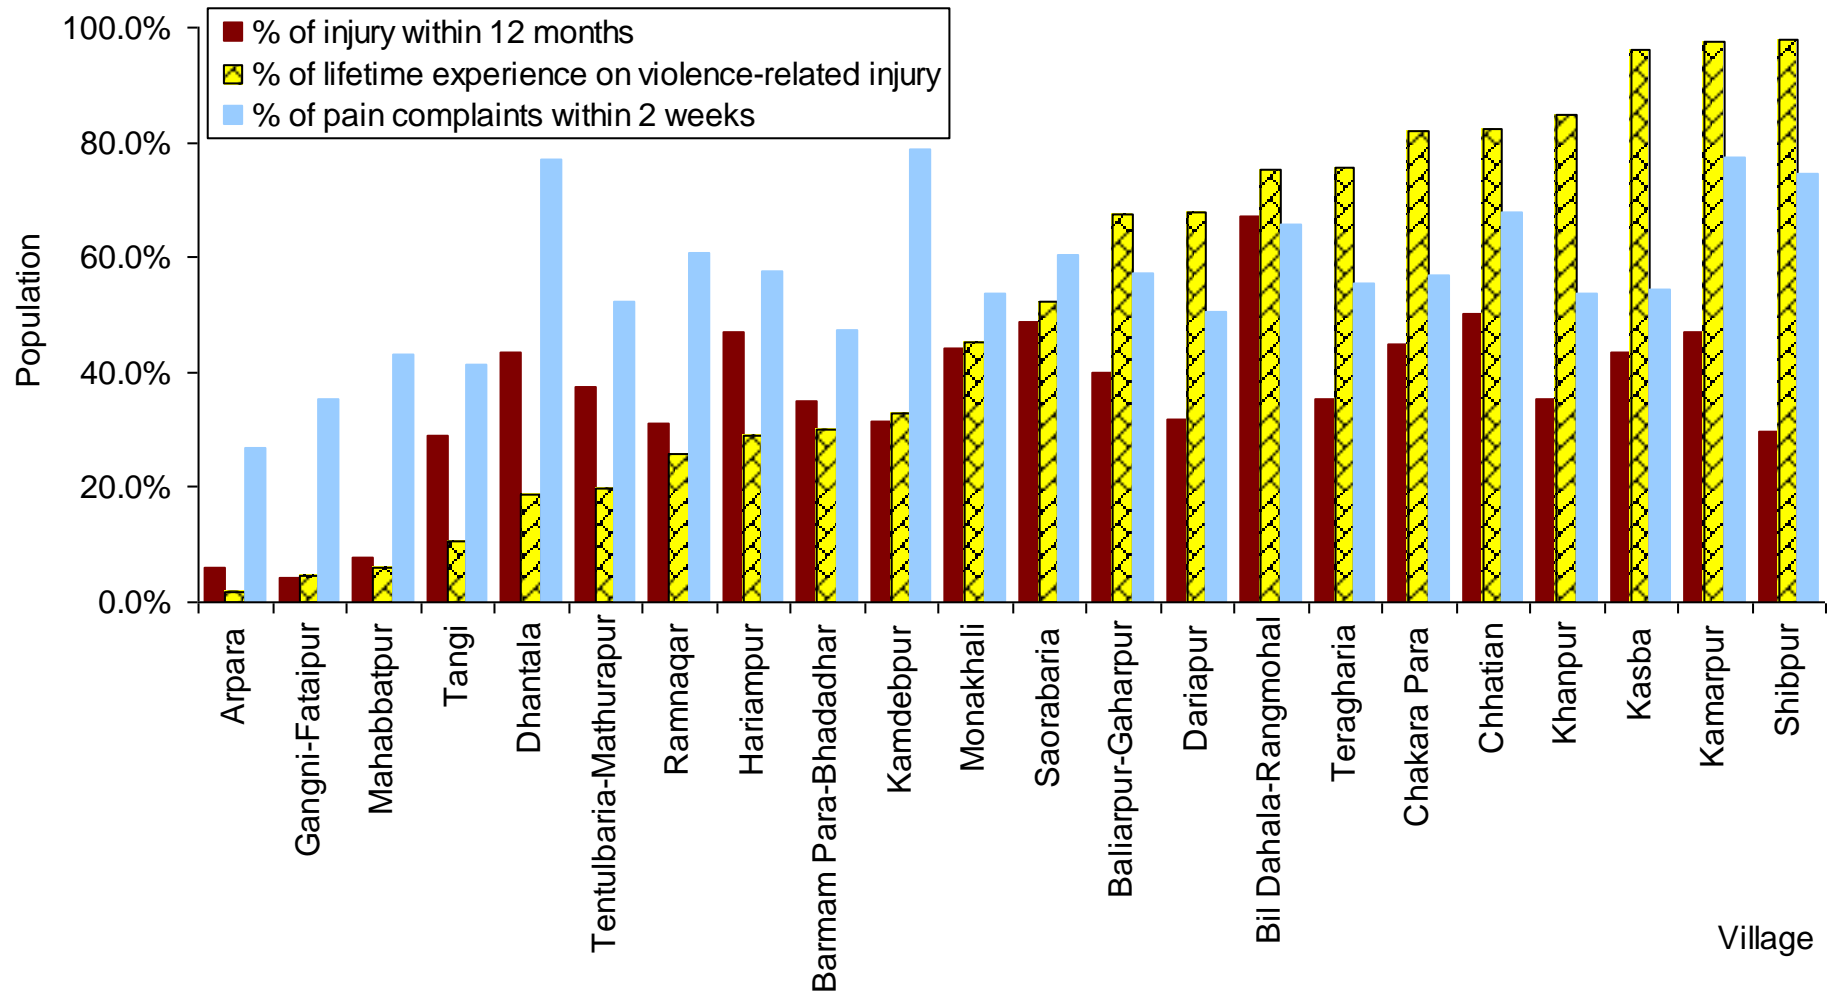

Supplement: MOESM4 [file 9537482]
